# Supplementary material
Source: PubMed Central journal article supplement (PMC2880850)

Supporting information:

# **BI-97C1, an Optically Pure Apogossypol Derivative as Pan-active Inhibitor of Anti-apoptotic B-cell lymphoma/leukemia-2 (Bcl-2) Family Proteins**

**Jun Wei,<sup>1</sup> John L. Stebbins,<sup>1</sup> Shinichi Kitada,<sup>1</sup> Rupesh Dash,<sup>2</sup> William Placzek,<sup>1</sup> Michele F. Rega,<sup>1</sup>  
Bainan Wu,<sup>1</sup> Jason Cellitti,<sup>1</sup> Dayong Zhai,<sup>1</sup> Li Yang,<sup>1</sup> Russell Dahl,<sup>1</sup> Paul B. Fisher,<sup>2</sup> John C.  
Reed,<sup>1</sup> and Maurizio Pellecchia<sup>1\*</sup>**

<sup>1</sup>*Sanford/Burnham Medical Research Institute, 10901 North Torrey Pines Rd, La Jolla, CA, 92037,  
USA.;*

<sup>2</sup>*Virginia Commonwealth University, School of Medicine, Richmond, VA 23298-0678*

\*Corresponding author: [mpellecchia@burnham.org](mailto:mpellecchia@burnham.org)

Phone: (858) 6463159

Fax: (858) 7955225

## **Contents:**

### **1. Experimental Section**

### **2. Supplementary Figures**

### **3. Spectrums of key compounds (<sup>1</sup>H-NMR, <sup>13</sup>C-NMR, HRMS and HPLC).**

## **1. Experimental Section.**

### **NMR Experiments.**

NMR-based binding assays have been conducted by acquiring one-dimensional <sup>1</sup>H experiments with 500 μL solution of Bcl-X<sub>L</sub> at 25 μM concentration, in absence and presence of added compounds, each at 200 μM concentration. By observing the aliphatic region of the spectra, binding could be readily detected due to chemical shift changes in active site methyl groups of Ile, Leu, Thr, Val or Ala (region between -0.8 and 0.3 ppm).<sup>1</sup> All experiments were performed with a 600 MHz spectrometer Bruker Avance 600 equipped with a cryogenic probe and z-axis pulse-field gradients.

### **Isothermal Titration Calorimetry Assays (ITC).**

Titration were performed using a VP-ITC or ITC200 calorimeter from Microcal (Northampton, MA). Bcl-X<sub>L</sub> was used at concentrations between 25 and 100 μM in 20 mM sodium phosphate buffer (pH 7.4) and 5-10% DMSO. Titrants were used at concentrations 10 to 15 fold that of the protein in the same buffer. Titrations were carried out at 25 °C. Data were analyzed using Microcal Origin software provided by the ITC manufacturer (Microcal, Northampton, MA).

### ***In Vitro* ADME Studies.**

**Liver Microsomal Stability.** Pooled rat liver microsomes (BD Biosciences, # 452701) were preincubated with test compounds at 37.5 °C for 5 min in the absence of NADPH. The reaction was initiated by addition of NADPH and then incubated under the same conditions. The final incubation concentrations were 4 μM test compound, 2 mM NADPH, and 1 mg/mL (total protein) liver

microsomes in phosphate-buffered saline (PBS) at pH 7.4. One aliquot (100  $\mu$ L) of the incubation mixture was withdrawn at 0, 15, 30, and 60 min and combined immediately with 200  $\mu$ L of ACN/MeOH containing an internal standard. After mixing, the sample was centrifuged at approximately 13,000 rpm for 12 min. The supernatant was transferred into an autosampler vial and the amount of test compound was quantified using the Shimadzu LCMS 2010EV mass spectrometer. The change of the AUC (area under the curve) of the parent compound as function of time was used as a measure of microsomal stability.

**Plasma Stability.** A 20  $\mu$ L aliquot of a 10 mM solution in DMSO of the test compound was added to 2.0 mL of heparinized rat plasma (Lampire, P1-150N) to obtain a 100  $\mu$ M final solution. The mixture was incubated for 1 h at 37.5  $^{\circ}$ C. Aliquots of 100  $\mu$ L were taken (0, 30 min, 1 h) and diluted with 200  $\mu$ L of MeOH containing internal standard. After mixing, the sample was centrifuged at approximately 13,000 rpm for 12 min. The supernatant was transferred into an autosampler vial and the amount of test compound was quantified using the Shimadzu LCMS-2010EV system. The change of the AUC (area under the curve) of the parent compound as function of time was used as a measure of plasma stability.

**PAMPA (parallel artificial membrane permeation assay).** A 96-well microtiter plate (Millipore, # MSSACCEPTOR) was completely filled with aqueous buffer solution (pH 7.2) and covered with a microtiter filterplate (Millipore, # MAPBMN310). The hydrophobic filter material was impregnated with a 10% solution of hexadecane in hexane and the organic solvent was allowed to completely evaporate. Permeation studies were started by the transfer of 200  $\mu$ L of a 100  $\mu$ M test compound solution on top of the filterplate. In general phosphate buffer at pH 7.2 buffer was used. The maximum DMSO content of the stock solutions was <5%. In parallel, an equilibrium solution lacking a membrane was prepared using the exact concentrations and specifications but lacking the membrane. The concentrations of the acceptor and equilibrium solutions were determined using the Shimadzu LCMS-2010EV and AUC methods. The permeation of a compound through the membrane layer is described by the percentage permeation (% flux). The flux values were calculated considering the concentration of

the acceptor compartment after 8 h and that of a reference well with the same concentration containing no membrane barrier.

### **Chemical Stability Studies.**

Compounds in a 10 mM of DMSO solution were incubated at various temperatures for different time period. 1  $\mu$ L of tested compound (10mM) was added to 99  $\mu$ L of Acetonitrile to obtain a 100  $\mu$ L final solution. The mixture was transferred into an autosampler vial and the amount of test compound was quantified using the Shimadzu LCMS-2010EV system. The change of the AUC (area under the curve) of the parent compound as function of time was used as a measure of chemical stability.

### **Toxicity Studies.**

Young female Balb/c mice (7-weeks-old) were injected with 25 mg/kg and 10 mg/kg of compounds (**11-14**) intraperitoneally (one mouse per dose) and observed for survival and weight loss for 11 days. Compounds (**11-14**) were first dissolved in 100% ethanol, supplemented by Cremophore EL and saline, just before injection, with a ratio of Ethanol: Cremophore EL: Saline = 10:10:80.

## **2. Supplementary Figures**

### **Supplementary Figure 1.**

## HPLC purity of isomers (9-14) using chiral column chromatography.

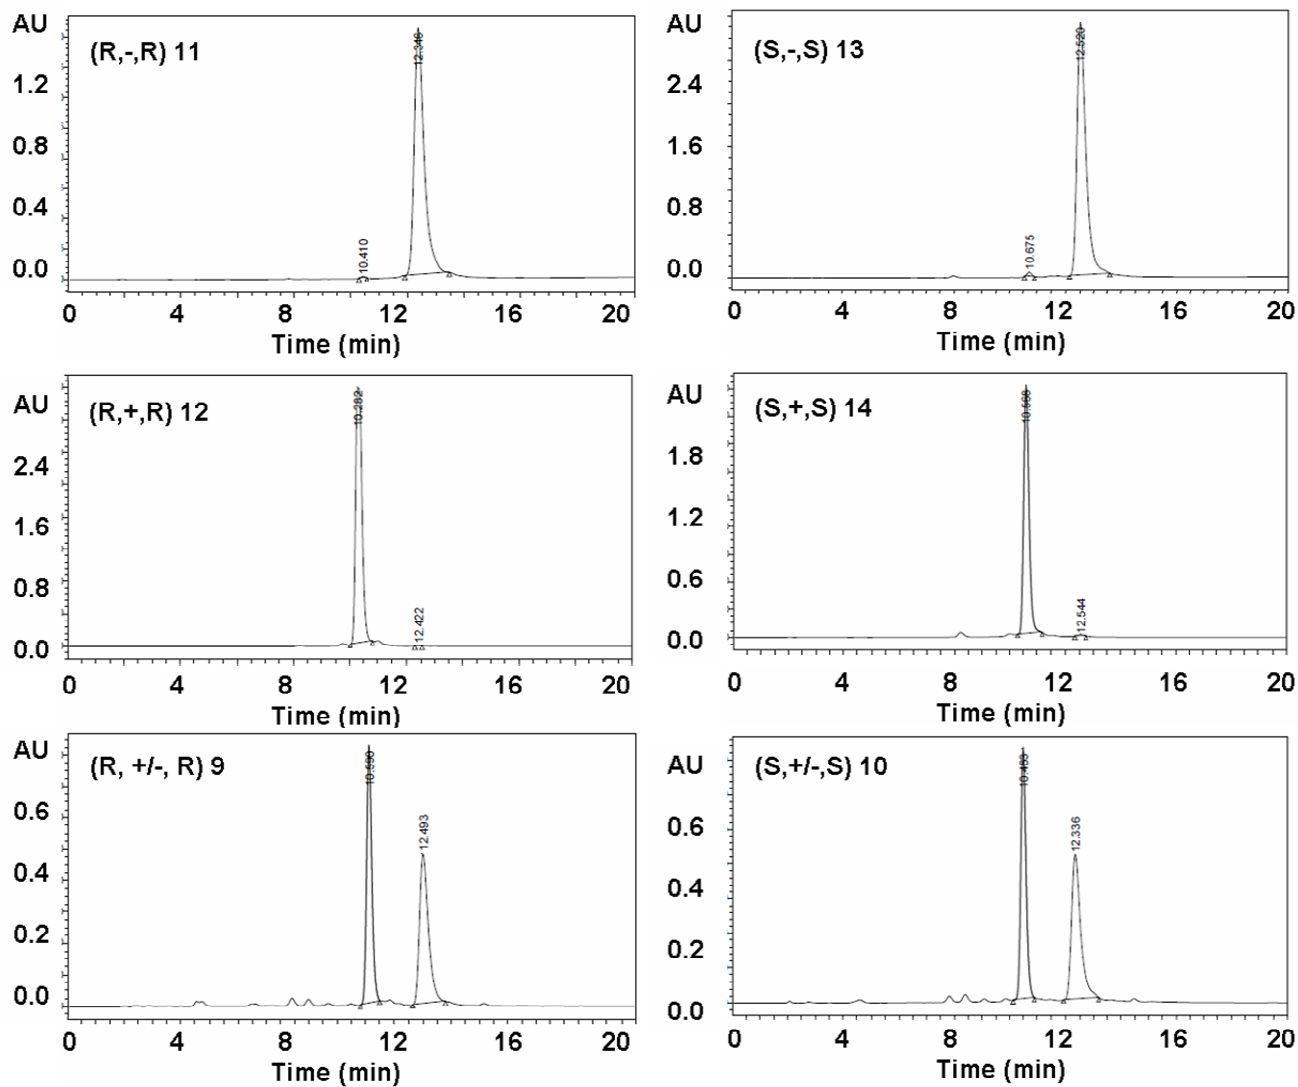

Supplementary Figure 2.

(A) Superposition of 2D [ $^{15}\text{N}$ ,  $^1\text{H}$ ]-TROSY spectra of hMcl-1 (200  $\mu\text{M}$ ; red) before and after addition of compound **11** (400  $\mu\text{M}$ ; blue). (B) and (C) Molecular docking studies. Stereo views of docked structures of compound **11** and compound **12** into hMcl-1 (PDB ID:2NL9). Molecular modeling suggested that the left pocket (P1) of Mcl-1 is shallow compared to the deeper pocket (P1) in Bcl-X<sub>L</sub> (Figure 3) and the right pocket of Mcl-1 (P2) is more open (Supporting Information Figure 2B) in comparison to that seen in Bcl-X<sub>L</sub> (Figure 3). The open right pocket (P2) and shallow left pocket (P1) of Mcl-1 are tolerant of different orientations of atropisomers **11** and **12**. Mcl-1 also have residues such as Asn260, Gly262, Val253 and His224 which can readily form two hydrogen bonds with both atropisomers **11** and **12** (Supporting Information Figure 2B and 2C).

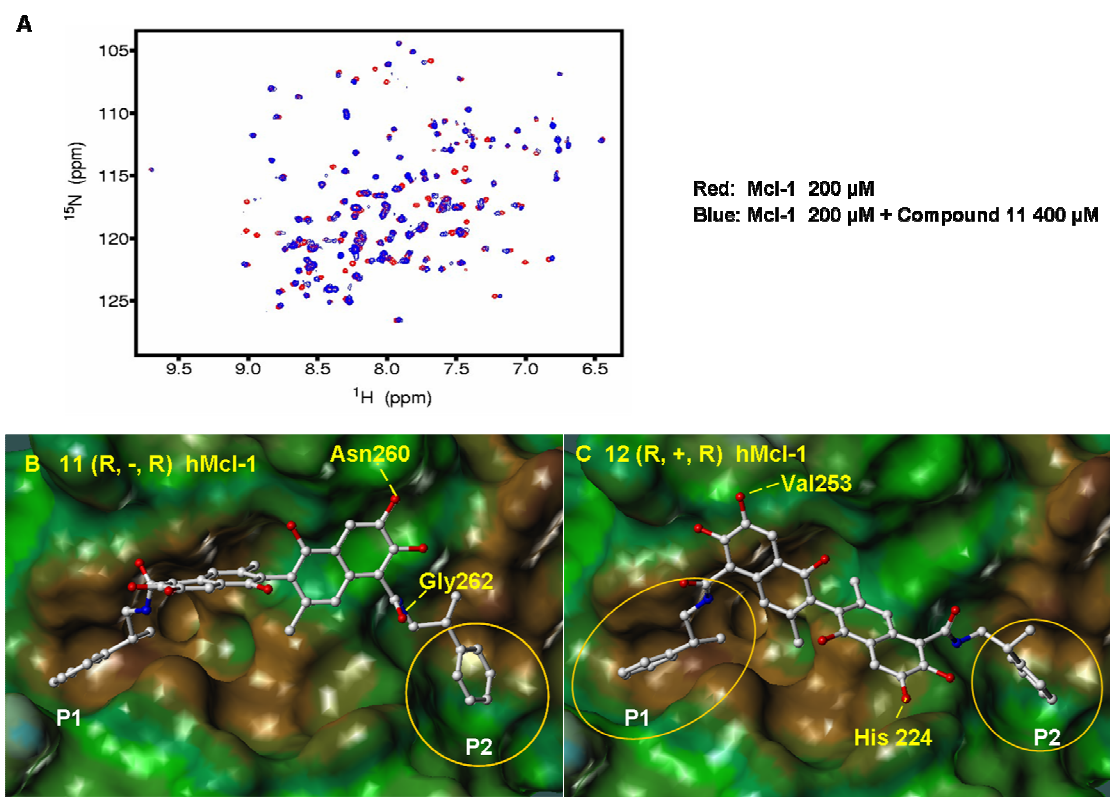

Supplementary Figure 3.

(A) and (B) Inhibition of cell growth by compound **11** and compound **12** in the human BP3 cell line. Apoptosis was monitored by Annexin V-FITC assays. (C) and (D) Mouse embryonic fibroblast cells with wild-type (MEF/WT; black square) or *bax*<sup>-/-</sup>*bak*<sup>-/-</sup> (MEF/DKO; red square) double knockout genotypes were treated with compounds **12** and **13** at various concentrations and apoptosis was monitored by Annexin V-FITC assays.

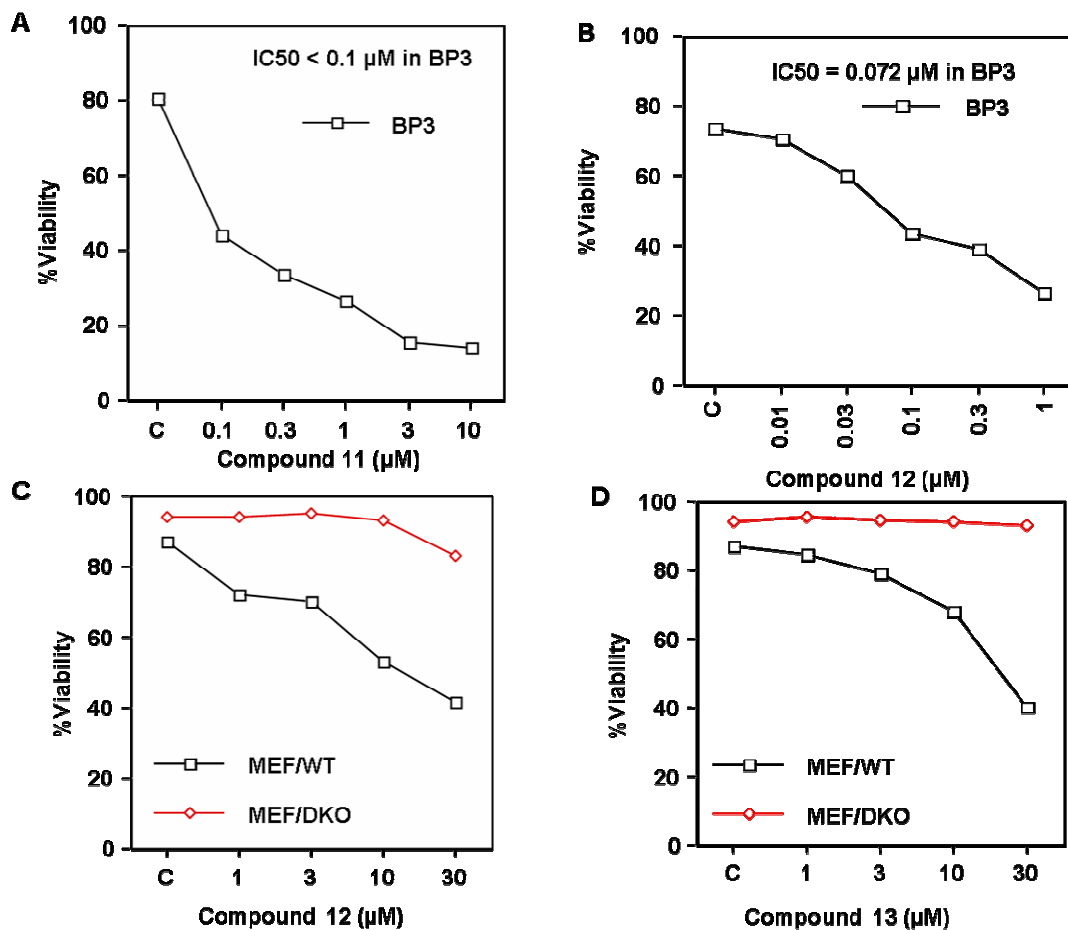

Supplementary Figure 4.

Chemical stabilities of compounds **11-14** in DMSO solution (10 mmol/L) were evaluated at different temperatures (21 °C and 37 °C) using LC-MS. Overall, compound **11** showed best chemical stability compared to compounds **12-14** at different temperatures.

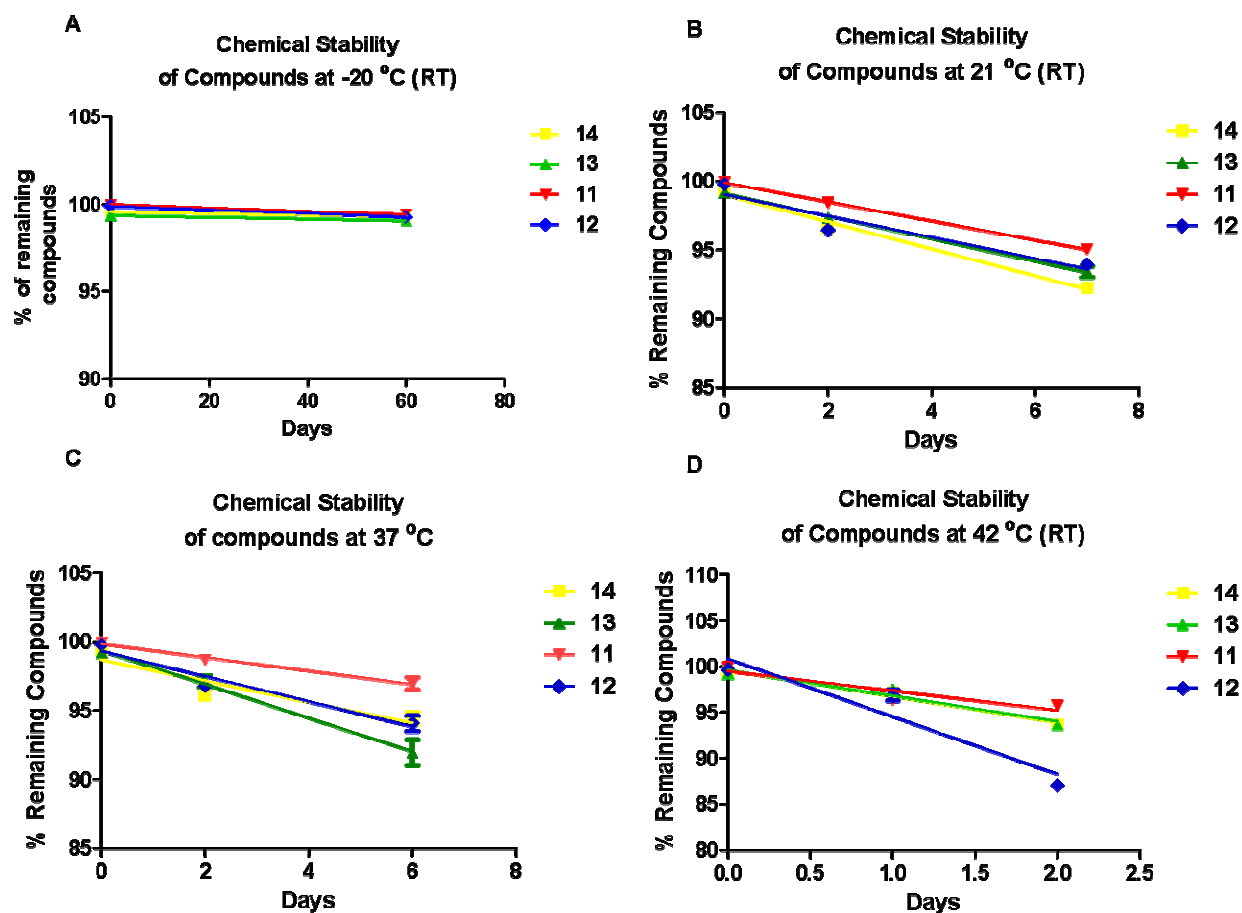

Supplementary Figure 5.



A) Tumor xenografts from M2182-Luc cells were established in athymic nude mice on the left and right flanks. After establishing visible tumors of  $\sim 75\text{-mm}^3$ , requiring  $\sim 5\text{-}6$  days, intraperitoneal (i.p.) injections of DMSO or compound **11** (1 mg/kg, 3 mg/kg or 5 mg/kg) were given every two days (total of nine injections). For *in vivo* imaging the mice were anesthetized and injected i.p. with 150 mg/kg luciferin and light emitted from each tumor determined in a Xenogen system with CCD camera with an integration time of 1 min. B) Photograph of the M2182-Luc xenograft tumors at the termination of the study (3 weeks post-treatment).

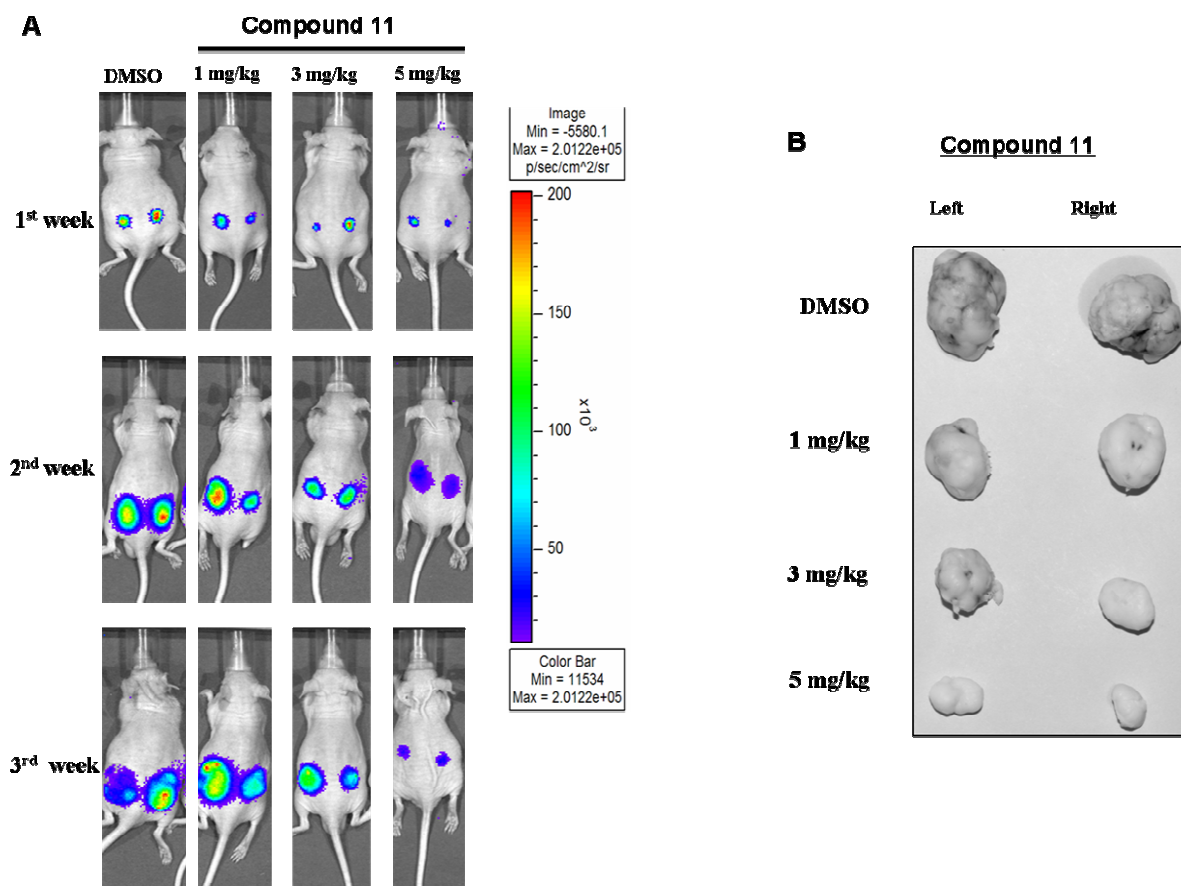

Supplementary Figure 6. Toxicity Studies.

Young female Balb/c mice (7-weeks-old) were injected with 25 mg/kg and 10 mg/kg of compounds (**11-14**) intraperitoneally (one mouse per dose) and observed for survival and weight loss for 11 days. Compounds (**11-14**) were first dissolved in 100% ethanol, supplemented by Cremophore EL and saline, just before injection, with a ratio of Ethanol: Cremophore EL: Saline = 10:10:80.

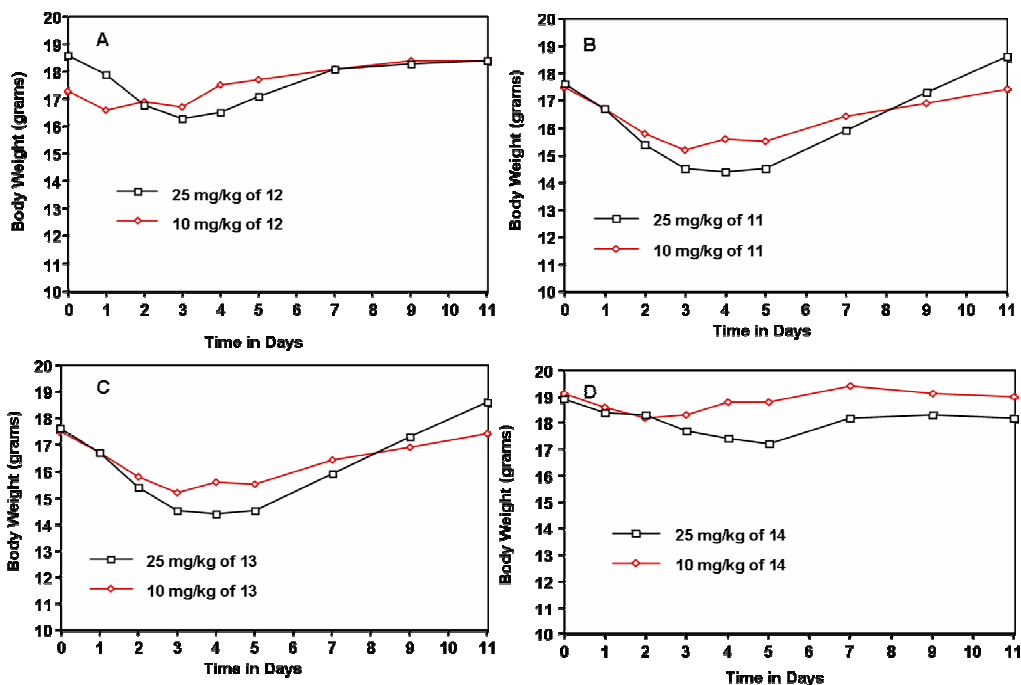

### 3. Spectrums of key compounds ( $^1\text{H-NMR}$ , $^{13}\text{C-NMR}$ , HRMS and HPLC).

Compound 11 B197C1 (R, -, R) 200 mg

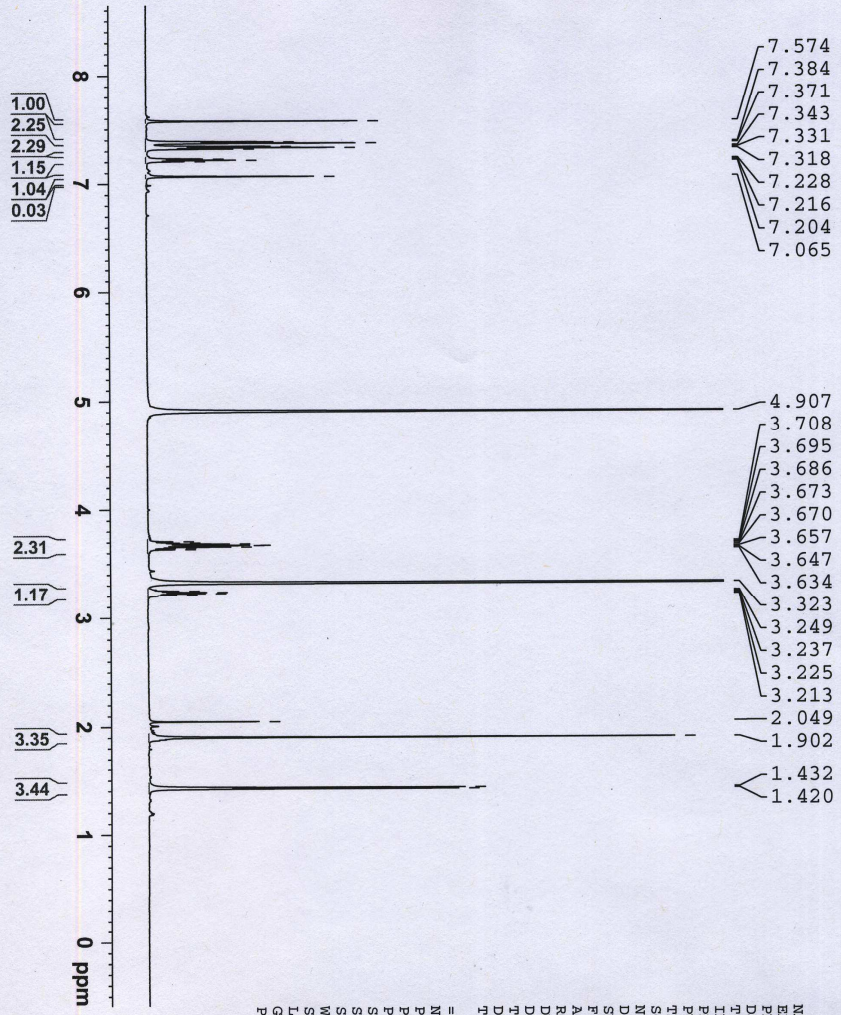

7.574  
7.384  
7.371  
7.343  
7.331  
7.318  
7.228  
7.216  
7.204  
7.065

4.907  
3.708  
3.695  
3.686  
3.673  
3.670  
3.657  
3.647  
3.634  
3.323  
3.249  
3.237  
3.225  
3.213  
2.049  
1.902  
1.432  
1.420

1.00  
2.25  
2.29  
1.15  
1.04  
0.03

2.31

1.17

3.35

3.44

8  
7  
6  
5  
4  
3  
2  
1  
0 ppm

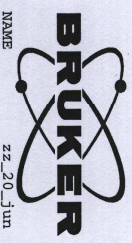

```

NAME          zz_20_jun
EXPNO         1
PROCNO        1
Date_         20090628
Time          11.09
INSTRUM       5 mm CP1CI 1H-
PROBHD        spect
PULPROG       zg
TD             16384
SOLVENT       MeOD
NS             4
DS             0
SWH            9615.385 Hz
FIDRES         0.586877 Hz
AQ             0.8520180 sec
RG             4
DE             52.000 usec
TE             300.0 K
D1             3.00000000 sec
TD0            1

===== CHANNEL f1 =====
NUC1           1H
P1             10.00 usec
PL1            6.00 dB
PL1W           3.69110036 W
SFO1           600.1328740 MHz
SI             32768
SF             600.1300558 MHz
WDW            EM
SSB            0
LB             1.00 Hz
GB             0
PC             1.00
  
```

Compound 9 (plus H5 b197B8)

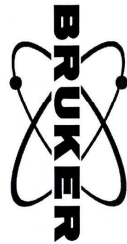

- 7.566
- 7.559
- 7.367
- 7.335
- 7.323
- 7.311
- 7.219
- 7.207
- 7.196
- 7.062
- 6.986
  
- 4.873
- 3.757
- 3.744
- 3.735
- 3.722
- 3.700
- 3.688
- 3.678
- 3.665
- 3.651
- 3.634
- 3.622
- 3.612
- 3.600
- 3.314
- 3.241
- 3.229
- 3.216
- 3.200
- 3.189
- 3.177
- 1.894
- 1.882
- 1.420
- 1.409

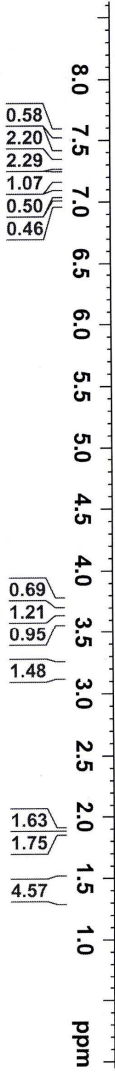

Current Data Parameters  
 NAME jun\_synthesis  
 EXPNO 715  
 PROCNO 1

F2 - Acquisition Parameters  
 Date\_ 20090310  
 Time 15.23

INSTRUM spect  
 PROBHD 5 mm TXI 1H/D-  
 PULPROG zg  
 TD 32000  
 SOLVENT MeOD  
 NS 16  
 DS 4

SWH 13227.514 Hz  
 FIDRES 0.413360 Hz  
 AQ 1.2096500 sec  
 RG 128

DW 37.800 usec  
 DE 6.50 usec  
 TE 298.0 K  
 DI 2.0000000 sec  
 TD0 1

==== CHANNEL f1 =====  
 NUC1 1H  
 P1 7.00 usec  
 PL1 -2.00 dB  
 SFO1 600.1328210 MHz

F2 - Processing parameters  
 SI 32768  
 SF 600.1300112 MHz  
 WDW EM  
 SSB 0  
 LB 2.00 Hz  
 GB 0  
 PC 1.00

Compound 12 BI97C2 (R,R,+) H5

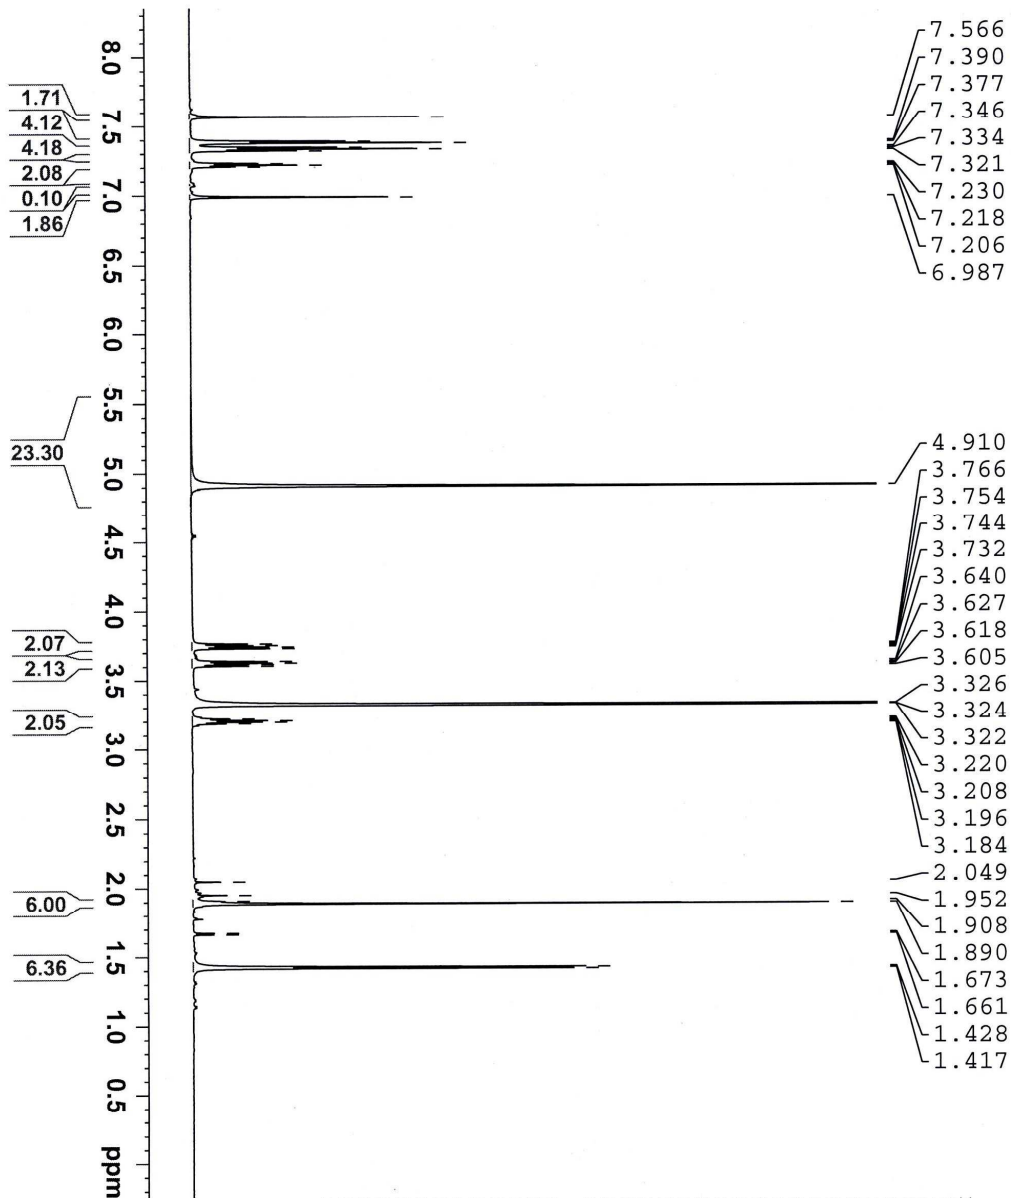

7.566  
7.390  
7.377  
7.346  
7.334  
7.321  
7.230  
7.218  
7.206  
6.987

4.910  
3.766  
3.754  
3.744  
3.732  
3.640  
3.627  
3.618  
3.605  
3.326  
3.324  
3.322  
3.220  
3.208  
3.196  
3.184  
2.049  
1.952  
1.908  
1.890  
1.673  
1.661  
1.428  
1.417

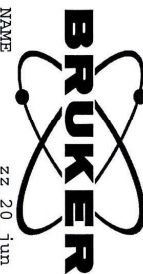

```

NAME          zz_20_jun
EXPNO         7
PROCNO        1
Date_         20090706
Time_         11.16
INSTRUM       5 mm CPTCL IH-
PROBHD        zg
PULPROG       16384
TD            MeOD
SOLVENT       4
NS            0
DS            0
SWH           9615.385 Hz
FIDRES        0.586877 Hz
AQ            0.8520180 sec
RG            4
DM            52.000 usec
DE            6.50 usec
TE            300.0 K
D1            3.00000000 sec
TD0           1

===== CHANNEL f1 =====
NUC1          1H
P1            10.00 usec
PL1           6.00 dB
PL1W          3.69110036 W
SFO1          600.1328740 MHz
SI            32768
SF            600.1300058 MHz
WDW           EM
SSB           0
LB            1.00 Hz
GB            0
PC            1.00
  
```

burnham

Project Name: J20090707  
Reported by User: System

Breeze

### SAMPLE INFORMATION

|                   |               |                  |                     |
|-------------------|---------------|------------------|---------------------|
| Sample Name:      | C1            | Acquired By:     | System              |
| Sample Type:      | Unknown       | Date Acquired:   | 9/8/2009 2:16:38 PM |
| Vial:             | 82            | Acq. Method:     | Burnham 50_95%B 280 |
| Injection #:      | 1             | Date Processed:  | 9/8/2009 4:07:17 PM |
| Injection Volume: | 20.00 ul      | Channel Name:    | 2487Channel 1       |
| Run Time:         | 20.00 Minutes | Sample Set Name: | M                   |

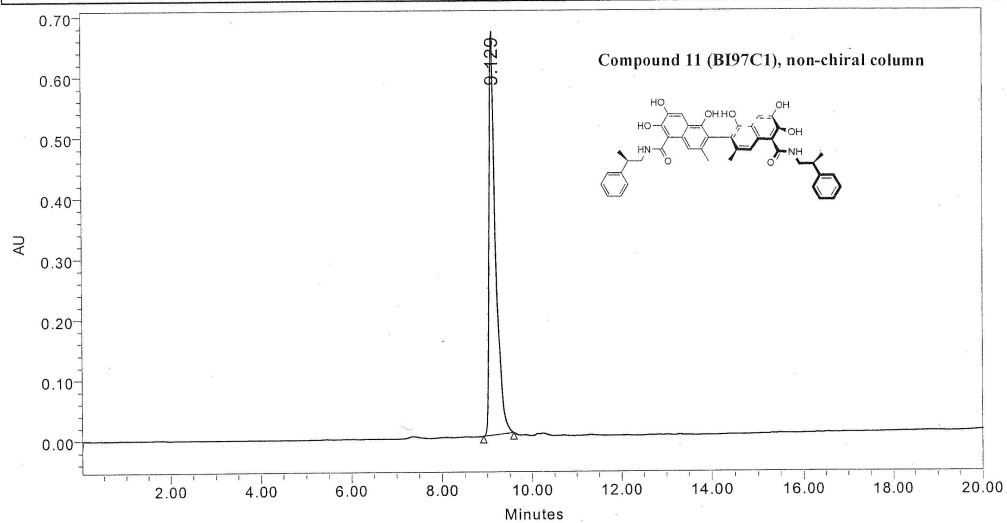

|   | RT (min) | Area ( $\mu V \cdot sec$ ) | % Area | Height ( $\mu V$ ) | % Height |
|---|----------|----------------------------|--------|--------------------|----------|
| 1 | 9.129    | 6599882                    | 100.00 | 666888             | 100.00   |

Final publication, chiral column.

CI = 11

burnham  
Project Name: J20090707  
Reported by User: System

'Breeze

### SAMPLE INFORMATION

|                   |               |                  |                       |
|-------------------|---------------|------------------|-----------------------|
| Sample Name:      | RRR H5 20MG   | Acquired By:     | System                |
| Sample Type:      | Unknown       | Date Acquired:   | 7/11/2009 3:33:46 PM  |
| Vial:             | 27            | Acq. Method:     | Burnham 40_80%B 20MIN |
| Injection #:      | 1             | Date Processed:  | 9/23/2009 9:44:51 PM  |
| Injection Volume: | 20.00 ul      | Channel Name:    | 2487Channel 2         |
| Run Time:         | 20.00 Minutes | Sample Set Name: | M                     |

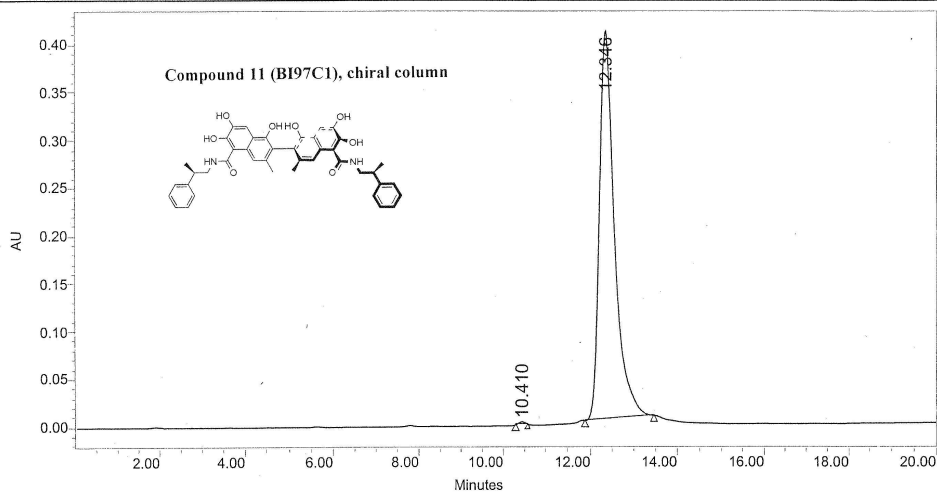

|   | RT (min) | Area (V*sec) | % Area | Height (V) | % Height |
|---|----------|--------------|--------|------------|----------|
| 1 | 10.410   | 25359        | 0.26   | 2741       | 0.67     |
| 2 | 12.346   | 9873573      | 99.74  | 406574     | 99.33    |

Polarity/Scan Type: Positive

Sample Name: baj5286

Acq. Date: Wednesday, August 19, 2009

Acq. File: 909010.wiff

Max: 2396 counts

+TOF MS: 0. min from 981909010.wiff Agilent

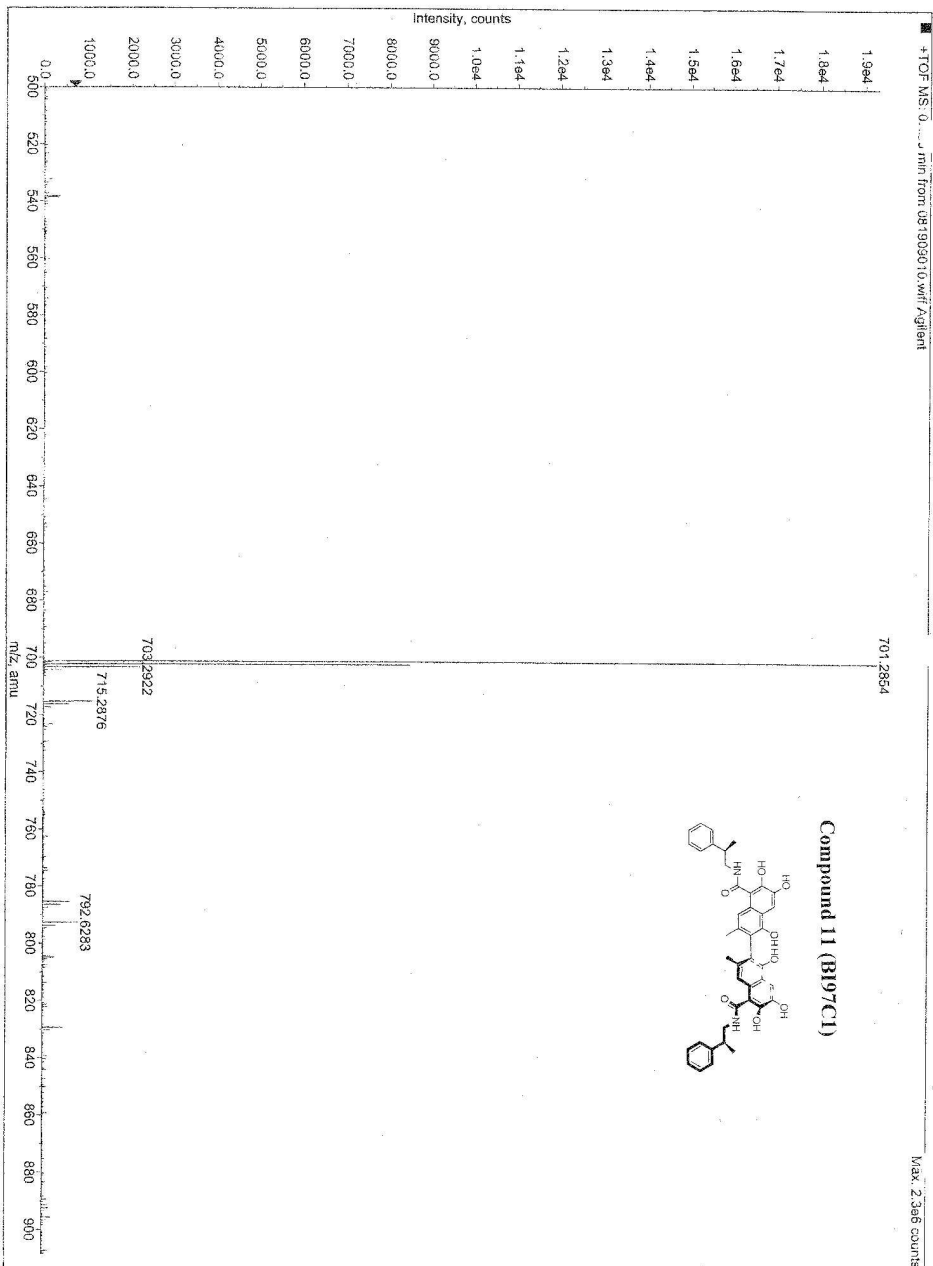

Supplement: NIHMS202533-supplement-1_si_001.pdf [file NIHMS202533-supplement-1_si_001.pdf]
